# Supplementary material for: Characterization of the complete mitogenome of Anopheles aquasalis, and phylogenetic divergences among Anopheles from diverse geographic zones
Source: PLoS One. 2019 Sep 3;14(9):e0219523. doi: 10.1371/journal.pone.0219523 (PMC6720026; doi:10.1371/journal.pone.0219523)
Supplement: S2 Table — Codon frequency and Relative synonymous Codon Usage (RSCU) are shown for each codon. (XLSX) [file pone.0219523.s005.xlsx]

## Sheet: Plan1
Codon	Count	RSCU	Codon	Count	RSCU	Codon	Count	RSCU	Codon	Count	RSCU
UUU(F)	328	1.78	UCU(S)	91	2.54	UAU(Y)	159	1.72	UGU(C)	36	1.8
UUC(F)	40	0.22	UCC(S)	13	0.36	UAC(Y)	26	0.28	UGC(C)	4	0.2
UUA(L)	479	4.53	UCA(S)	81	2.26	UAA(*)	43	1.26	UGA(W)	74	1.85
UUG(L)	49	0.46	UCG(S)	6	0.17	UAG(*)	25	0.74	UGG(W)	6	0.15
CUU(L)	44	0.42	CCU(P)	65	2.24	CAU(H)	70	1.69	CGU(R)	14	1.1
CUC(L)	11	0.1	CCC(P)	8	0.28	CAC(H)	13	0.31	CGC(R)	2	0.16
CUA(L)	41	0.39	CCA(P)	39	1.34	CAA(Q)	75	1.47	CGA(R)	31	2.43
CUG(L)	10	0.09	CCG(P)	4	0.14	CAG(Q)	27	0.53	CGG(R)	4	0.31
AUU(I)	311	1.89	ACU(T)	93	2.14	AAU(N)	170	1.81	AGU(S)	44	1.23
AUC(I)	18	0.11	ACC(T)	9	0.21	AAC(N)	18	0.19	AGC(S)	8	0.22
AUA(M)	204	1.77	ACA(T)	68	1.56	AAA(K)	77	1.4	AGA(S)	44	1.23
AUG(M)	27	0.23	ACG(T)	4	0.09	AAG(K)	33	0.6	AGG(S)	0	0
GUU(V)	67	1.54	GCU(A)	82	2.23	GAU(D)	70	1.47	GGU(G)	30	0.63
GUC(V)	7	0.16	GCC(A)	14	0.38	GAC(D)	25	0.53	GGC(G)	6	0.13
GUA(V)	93	2.14	GCA(A)	46	1.25	GAA(E)	78	1.71	GGA(G)	124	2.61
GUG(V)	7	0.16	GCG(A)	5	0.14	GAG(E)	13	0.29	GGG(G)	30	0.63
