# Supplementary material for: Characterization of the complete mitogenome of Anopheles aquasalis, and phylogenetic divergences among Anopheles from diverse geographic zones
Source: PLoS One. 2019 Sep 3;14(9):e0219523. doi: 10.1371/journal.pone.0219523 (PMC6720026; doi:10.1371/journal.pone.0219523)
Supplement: S3 Table — (XLSX) [file pone.0219523.s006.xlsx]

## Sheet: Plan1
Aminoacid	Codon	Count	RSCU
Leucine	UUA(L)	479	4.53
Phenylalanine	UUU(F)	328	1.78
Isoleucine	AUU(I)	311	1.89
Methionine	AUA(M)	204	1.77
Asparagine	AAU(N)	170	1.81
Tyrosine	UAU(Y)	159	1.72
Glycine	GGA(G)	124	2.61
Valine	GUA(V)	93	2.14
Threonine	ACU(T)	93	2.14
Serine	UCU(S)	91	2.54
